# Supplementary material for: Assembly and spontaneous resolution of the chiral inorganic polyoxometalates-based frameworks via helical chains association
Source: Royal Society of Chemistry journal article supplement (doi:10.1039/c3dt50672j), 2013-01-01
Supplement: c3dt50672j.pdf [file c3dt50672j.pdf]

## Supporting Information

### **Assembly and spontaneous resolution of the chiral inorganic polyoxometalates-based frameworks via helical chains association**

Qun Tang,<sup>a</sup> Shuxia Liu,<sup>\*a</sup> Yiwei Liu,<sup>a</sup> Shujun Li,<sup>a</sup> Fengji Ma,<sup>a</sup> Jianxin Li,<sup>a</sup> Shengtian Wang<sup>a</sup> and  
Chengzhan Liu<sup>a</sup>

*Key Laboratory of Polyoxometalates Science of Ministry of Education, College of Chemistry,  
Northeast Normal University, Changchun City, Jilin, P. R. China 130024.*

*E-mail: liusx@nenu.edu.cn*

*Tel/ Fax: +86 43185099328*

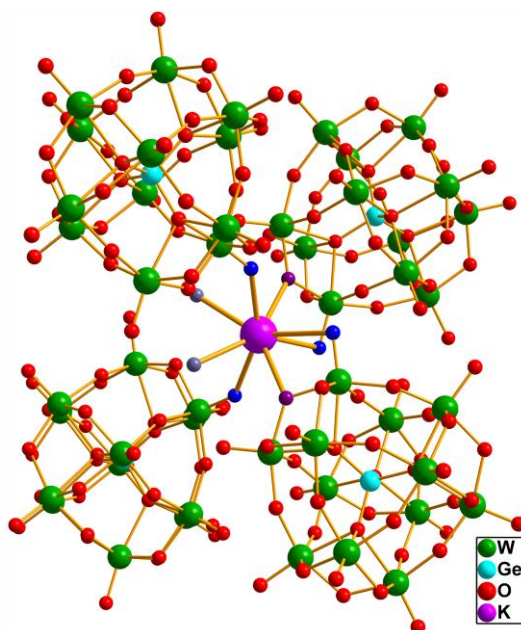

**Fig. S1** The  $K^+$  cation eightfold coordinates to four terminal oxygen atoms (blue) of four  $[GeW_{12}O_{40}]^{4-}$  polyoxoanions, two  $\mu_2$ -bridging oxygens (violet) of two  $[GeW_{12}O_{40}]^{4-}$  polyoxoanions, and two water molecules (blue gray).

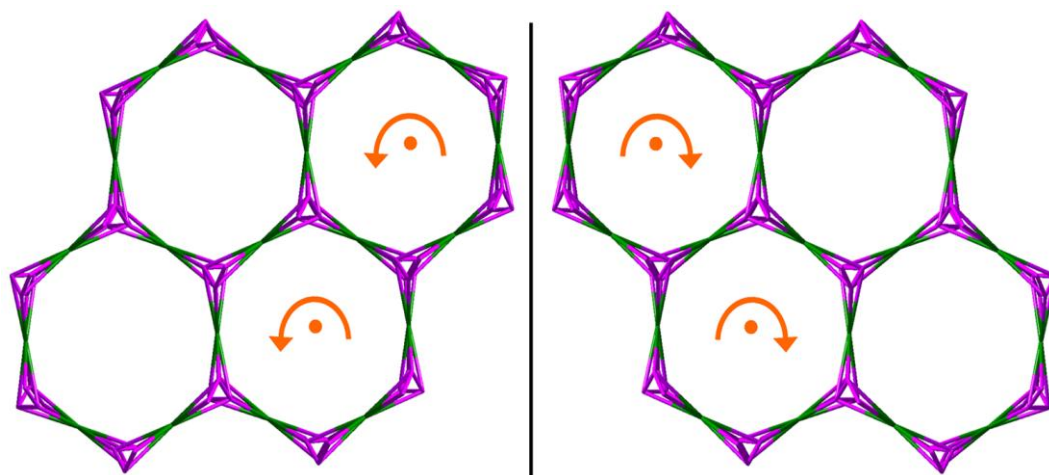

**Fig. S2** Schematic representations of mirror images of 3D chiral inorganic frameworks in compounds **1a** and **2a** (left), and **1b** and **2b** (right). (The handedness of some helices is illustrated as arrows). The  $K^+$  cation as a four-connected node, and each  $[GeW_{12}O_{40}]^{4-}$  or  $[SiW_{12}O_{40}]^{4-}$  as an eight-connected node.

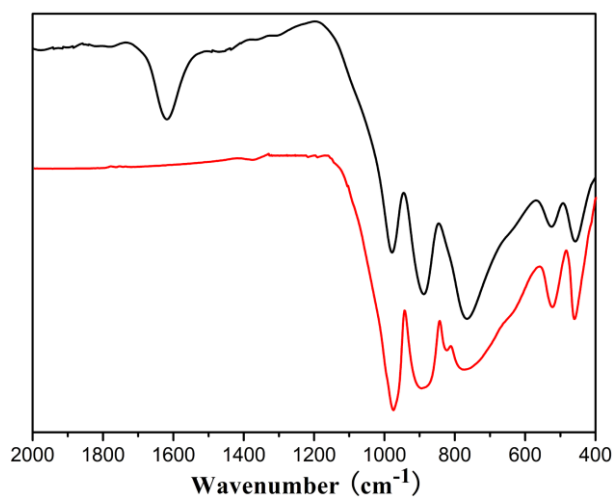

**Fig. S3** The IR spectra of the compound **1** (black) and the thermally activated form of **1** (red).

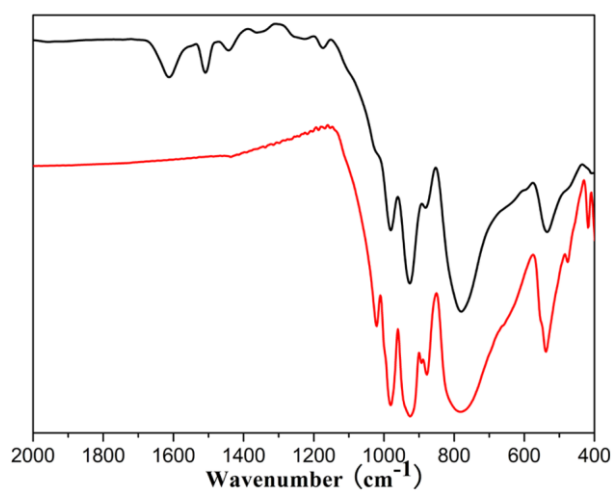

**Fig. S4** The IR spectra of the compound **2** (black) and the thermally activated form of **2** (red).

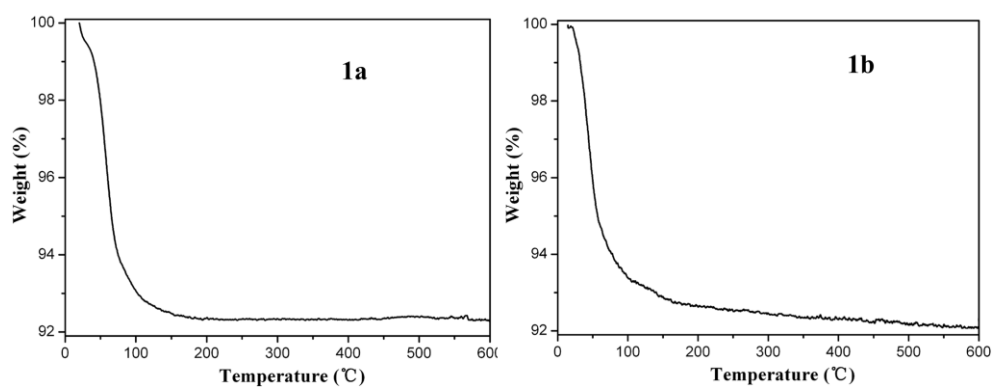

**Fig. S5** The TG curves of **1a** and **1b** exhibit one weight loss stages in the temperature ranges 20–600 °C. Heating rate: 10 deg min<sup>-1</sup>, N<sub>2</sub> atmosphere.

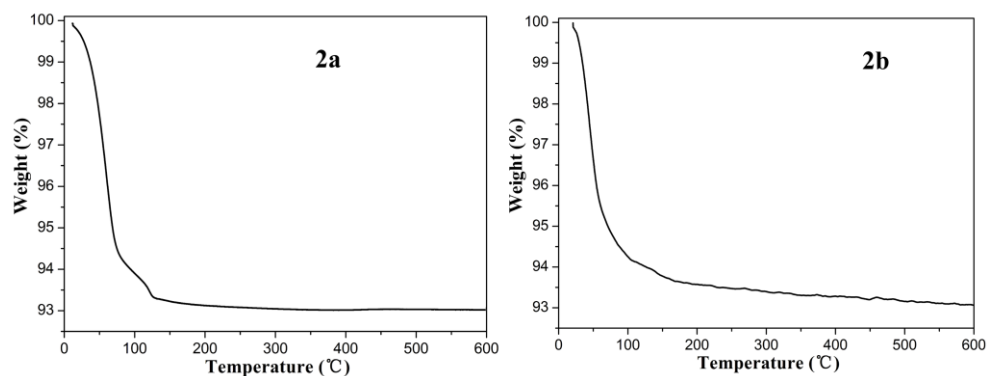

**Fig. S6** The TG curves of **2a** and **2b** exhibit one weight loss stages in the temperature ranges 20–600 °C. The weight loss of 6.78% (calcd. 6.64%) for **2a** and 6.69% (calcd. 6.64%) for **2b** at 150 °C, which correspond to the loss of all the crystallization and coordination water molecules. Heating rate: 10 deg min<sup>-1</sup>, N<sub>2</sub> atmosphere.

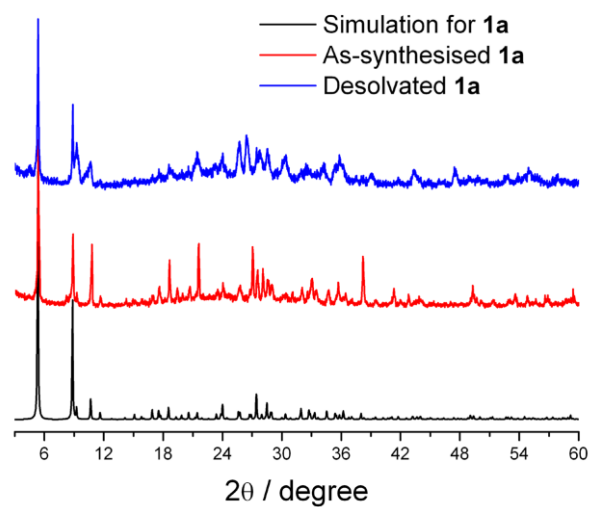

**Fig. S7** The XRPD patterns for simulated, as-synthesised, and desolvated samples of **1a**.

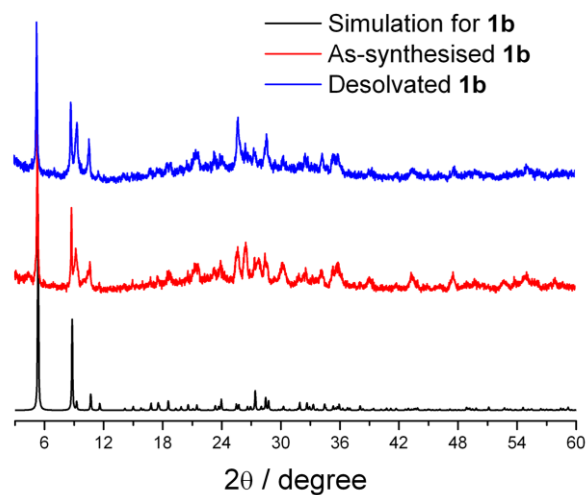

**Fig. S8** The PXRD patterns for simulated, as-synthesised, and desolvated samples of **1b**.

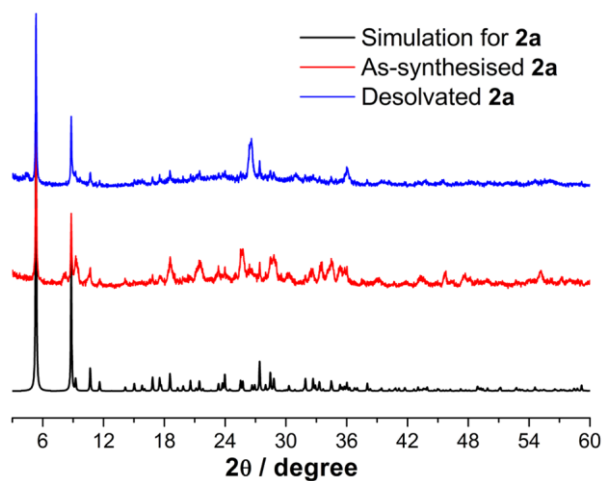

**Fig. S9** The PXRD patterns for simulated, as-synthesised, and desolvated samples of **2a**.

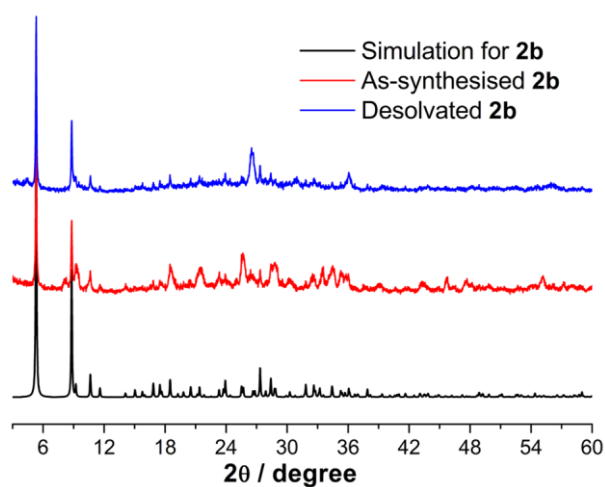

**Fig. S10** The PXRD patterns for simulated, as-synthesised, and desolvated samples of **2b**.

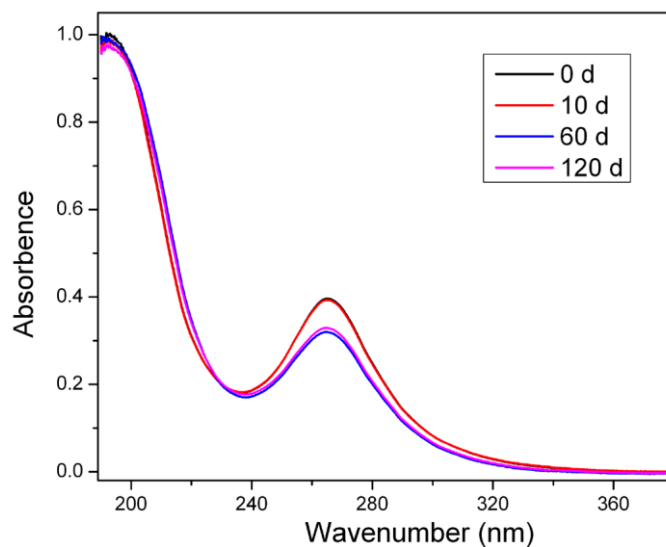

**Fig. S11** The influence of time on the stability of compound **1** in the aqueous solution.  
Conditions: the pH value that **1** was dissolved in water ( $1 \times 10^{-5} \text{ mol L}^{-1}$ ) is 6.0.

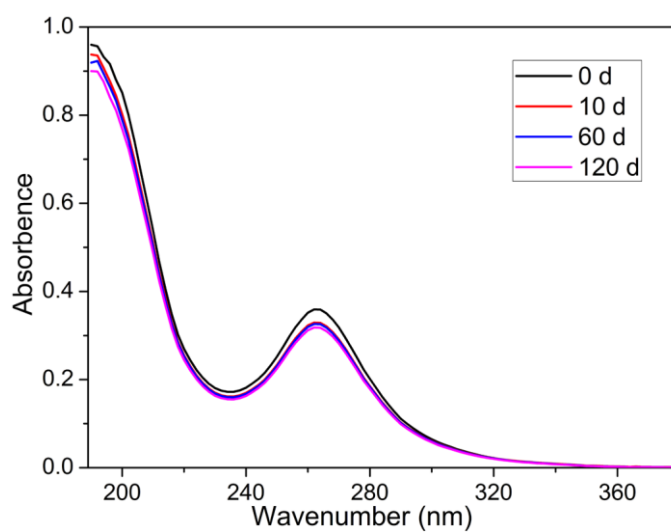

**Fig. S12** The influence of time on the stability of compound **2** in the aqueous solution.  
Conditions: the pH value that **2** was dissolved in water ( $1 \times 10^{-5} \text{ mol L}^{-1}$ ) is 6.0.

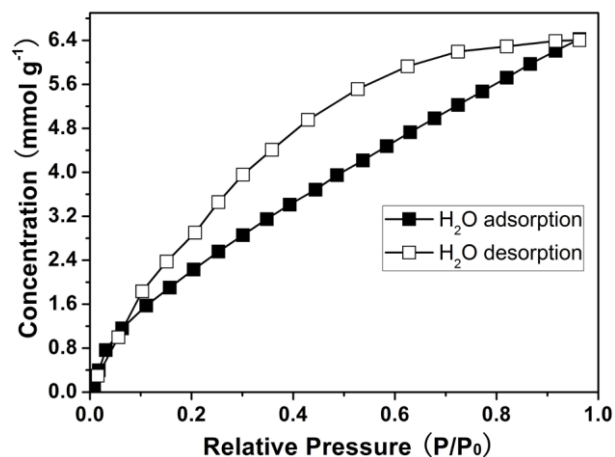

Fig. S13 The water adsorption and desorption curves of **1** at 298 K

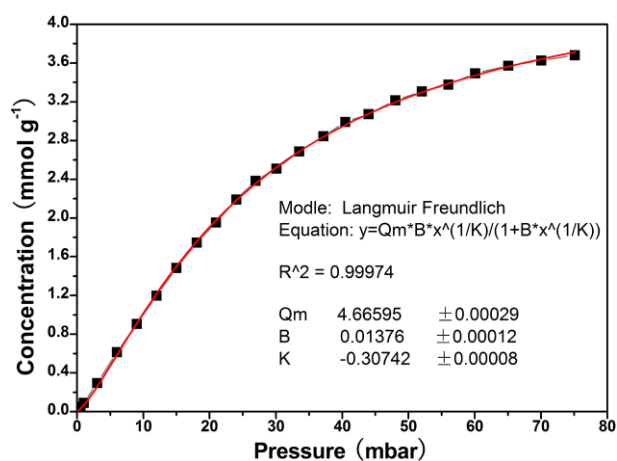

Fig. S14 Curve fitting of ethanol adsorption isotherm of **1** recorded at 298 K using Langmuir-Freundlich equation.

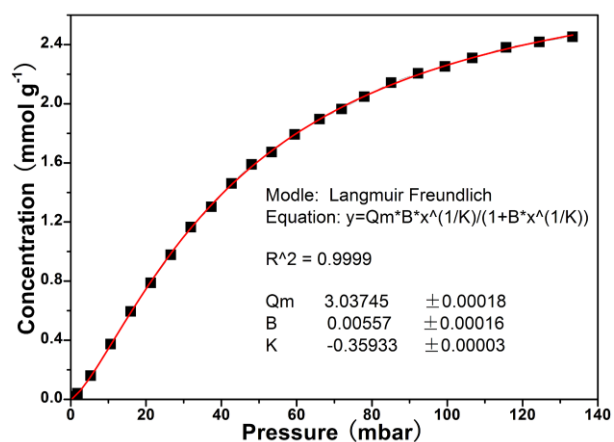

Fig. S15 Curve fitting of ethanol adsorption isotherm of **1** recorded at 308 K using Langmuir-Freundlich equation.

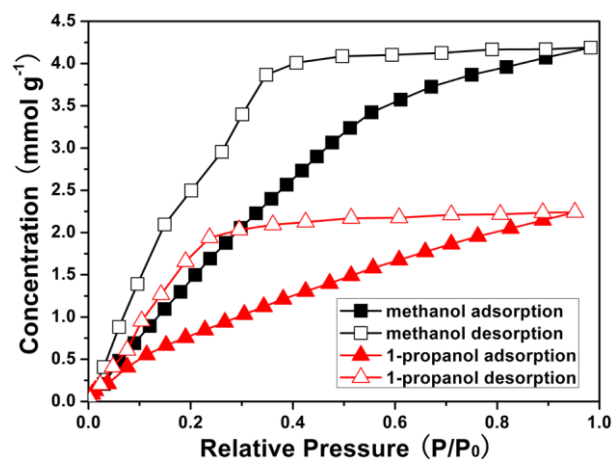

**Fig. S16** Methanol and 1-propanol adsorption and desorption curves at 298 K for **1**.

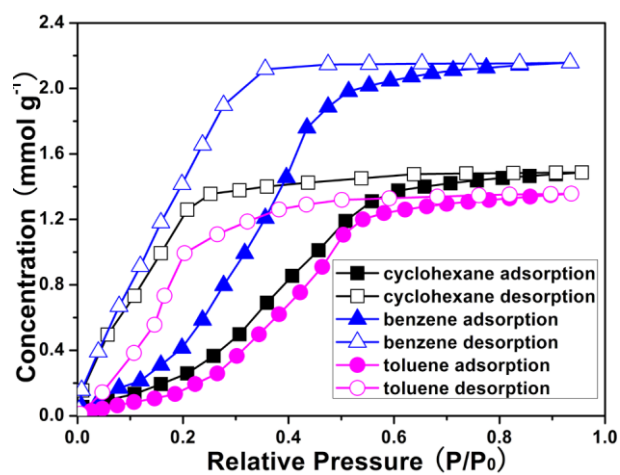

**Fig. S17** Cyclohexane, benzene, and toluene adsorption and desorption curves at 298 K for

**1**.



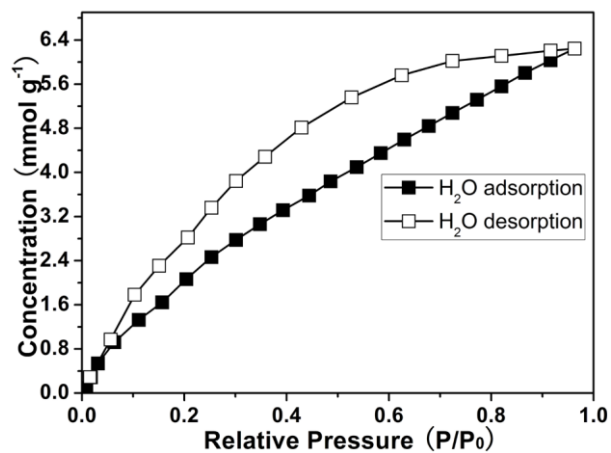

**Fig. S18** The water adsorption and desorption curves of **2** at 298 K

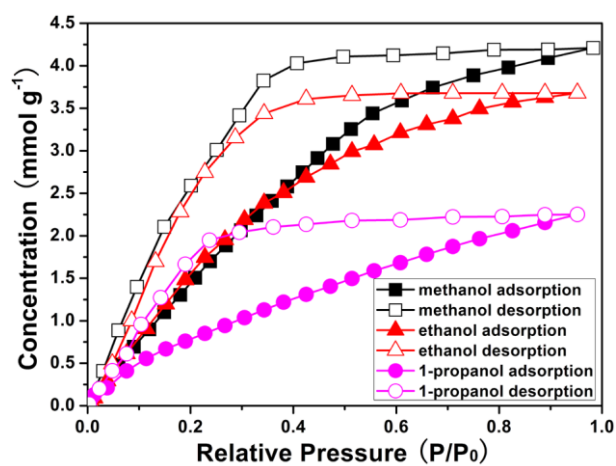

**Fig. S19** Methanol, ethanol, and 1-propanol adsorption and desorption curves at 298 K for **2**.

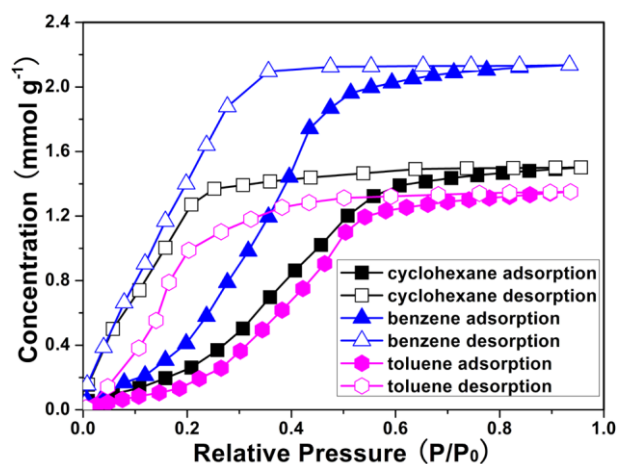

**Fig. S20** Cyclohexane, benzene, and toluene adsorption and desorption curves at 298 K for **2**.

**Table S1** The VOCs adsorption properties of **1** and **2** at 298 K.

| Adsorption amount | <b>1</b> (mmol g <sup>-1</sup> ) | <b>2</b> (mmol g <sup>-1</sup> ) | <b>1</b> (molecules per formula unit) | <b>2</b> (molecules per formula unit) |
|-------------------|----------------------------------|----------------------------------|---------------------------------------|---------------------------------------|
| water             | 6.42                             | 6.24                             | 57.75                                 | 56.19                                 |
| methanol          | 4.19                             | 4.21                             | 37.69                                 | 37.89                                 |
| ethanol           | 3.68                             | 3.73                             | 33.11                                 | 33.51                                 |
| 1-propanol        | 2.23                             | 2.25                             | 20.06                                 | 20.24                                 |
| cyclohexane       | 1.49                             | 1.50                             | 13.45                                 | 13.50                                 |
| benzene           | 2.16                             | 2.13                             | 19.47                                 | 19.21                                 |
| toluene           | 1.36                             | 1.33                             | 12.25                                 | 11.98                                 |

### Estimation of adsorption enthalpy

The adsorption isotherms were fitted using the Langmuir-Freundlich equation instead of the more commonly used Langmuir equation. The Langmuir-Freundlich model gives a better fit over the entire measured pressure range, resulting in a more accurate prediction of the adsorption capacity at saturation. The calculation of the enthalpy of VOCs adsorption using

Clausius-Clapeyron equation:

$$\ln\left(\frac{P_1}{P_2}\right) = \Delta H_{\text{ads}} \times \frac{T_2 - T_1}{RT_1 T_2} \quad (1)$$

$P$  = pressure for isotherm

$T$  = temperature for isotherm

$R = 8.315 \text{ J K}^{-1} \text{ mol}^{-1}$

Equation (1) can be used as a function of the quantity of adsorbed to calculate the adsorption enthalpy. The pressure as a function of the amount of adsorbed was determined by using Langmuir-Freundlich fit for the adsorption isotherms.

$$\frac{Q}{Q_m} = \frac{BP^{(1/t)}}{1 + BP^{(1/t)}} \quad (2)$$

$Q$  = moles adsorbed

$Q_m$  = moles adsorbed at saturation

$P$  = pressure

$B$  and  $t$  = constants.

Rearranging (2) to obtained:

$$P = \left( \frac{Q/Q_m}{B - BQ/Q_m} \right)^t \quad (3)$$

Replacing  $P$  in equation (1), the  $\Delta H_{\text{ads}}$  can be calculated from the following formula:

$$\Delta H_{ads} = \frac{RT_1T_2}{T_2 - T_1} \times \ln \frac{\left( \frac{Q/Q_{m1}}{B_1 - B_1Q/Q_{m1}} \right)^t}{\left( \frac{Q/Q_{m2}}{B_2 - B_2Q/Q_{m2}} \right)^t} \quad (4)$$

### References

1. M. Dincă, J.R. Long, J. Am. Chem. Soc. 127 (2005) 9376–9381.
2. S.Q. Ma, H.C. Zhou, J. Am. Chem. Soc. 128 (2006) 11734–11735.
3. B. Chen, X. Zhao, A. Putkham, K. Hong, E.B. Lobkovsky, E.J. Hurtado, A.J. Fletcher, K.M. Thomas, J. Am. Chem. Soc. 130 (2008), 6411–6423.
